# Supplementary material
Source: publisher figshare collection journal article supplement (https://sage.figshare.com/ndownloader/files/23208236)
Supplement: Supplementary file 1 [file 23208236]

Table A1. Descriptive statistics for women who attended BreastScreen Norway, 1996-2019

|                                           | n (%)         | Median number of<br>attendances (IQR*) |
|-------------------------------------------|---------------|----------------------------------------|
| Education level, n = 25,083               |               |                                        |
| No education (excluded from the analysis) | 117 (0.5)     | 7 (4-10)                               |
| Primary school                            | 7 242 (29.6)  | 10 (9-10)                              |
| Secondary school                          | 9 498 (37.9)  | 10 (9-10)                              |
| College/university (<4 years)             | 4 911 (19.6)  | 10 (9-10)                              |
| College/university (>3 years)             | 3 133 (12.5)  | 10 (9-10)                              |
| Body mass index, n = 36,180               |               |                                        |
| Underweight                               | 511 (1.4)     | 9 (8-10)                               |
| Normal                                    | 16 613 (45.9) | 10 (9-10)                              |
| Overweight                                | 13 394 (37.0) | 10 (9-10)                              |
| Obese                                     | 5 662 (15.7)  | 10 (9-10)                              |
| Physical activity, n = 36,063             |               |                                        |
| <2 hours a week                           | 20 277 (56.2) | 10 (9-10)                              |
| 2-3 hours a week                          | 11 478 (31.8) | 10 (9-10)                              |
| >3 hours a week                           | 4 308 (12.0)  | 10 (9-10)                              |
| Smoking status, n = 37,204                |               |                                        |
| Never                                     | 14 810 (39.8) | 10 (9-10)                              |
| Ever (currently/previously)               | 22 394 (60.2) | 10 (9-10)                              |

\*IQR: interquartile range.

Table A2. Unadjusted and adjusted odds ratio (OR) and predicted probability of attending on all 10 invitations according to given variables for the women involved in BreastScreen Norway, 1996-2019

|                               | Unadjusted<br>OR | 95% CI*   | Adjusted<br>OR | 95% CI*   | Predicted<br>probability | 95% CI* |
|-------------------------------|------------------|-----------|----------------|-----------|--------------------------|---------|
| Education level               |                  |           |                |           |                          |         |
| Primary school                | Ref.             |           | Ref.           |           | 64%                      | 63%-65% |
| Secondary school              | 1.11             | 1.04-1.18 | 1.04           | 0.98-1.11 | 65%                      | 64%-66% |
| College/university (<4 years) | 0.98             | 0.91-0.93 | 0.86           | 0.80-0.93 | 61%                      | 59%-62% |
| College/university (>3 years) | 0.86             | 0.79-0.94 | 0.73           | 0.67-0.80 | 57%                      | 54%-58% |
| Body mass index               |                  |           |                |           |                          |         |
| Underweight                   | 0.56             | 0.47-0.67 | 0.57           | 0.45-0.72 | 49%                      | 44%-55% |
| Normal                        | Ref.             |           | Ref.           |           | 63%                      | 62%-64% |
| Overweight                    | 1.05             | 1.00-1.10 | 1.05           | 0.99-1.11 | 64%                      | 63%-65% |
| Obese                         | 0.94             | 0.89-1.00 | 0.95           | 0.88-1.02 | 62%                      | 60%-63% |
| Physical activity             |                  |           |                |           |                          |         |
| <2 hours a week               | Ref.             |           | Ref.           |           | 59%                      | 58%-60% |
| 2-3 hours a week              | 1.33             | 1.27-1.40 | 1.38           | 1.30-1.47 | 67%                      | 66%-68% |
| >3 hours a week               | 1.39             | 1.30-1.49 | 1.48           | 1.36-1.62 | 68%                      | 67%-70% |
| Smoking status                |                  |           |                |           |                          |         |
| Never                         | Ref.             |           | Ref.           |           | 68%                      | 67%-69% |
| Ever (currently/previously)   | 0.73             | 0.70-0.76 | 0.68           | 0.64-0.72 | 59%                      | 58%-60% |

\*95% CI: 95% confidence interval.
